# Supplementary material for: Association of Body Mass Index with Risk of Household Catastrophic Health Expenditure in China: A Population-Based Cohort Study
Source: MDPI journal article supplement (doi:10.3390/nu14194014), 2022-09-27
Supplement: s1 [file s1]

**Table S1.** Fully-adjusted Cox proportional hazard model analysis for the association of BMI with risk of CHE.

| Characteristics         | Number ( <i>n</i> = 11185, %) | Events ( <i>n</i> = 3275, %) | aHR (95%CI)      | <i>p</i> -value |
|-------------------------|-------------------------------|------------------------------|------------------|-----------------|
| BMI                     |                               |                              |                  |                 |
| Normal                  | 6833 (61.1)                   | 1968 (28.8)                  | Ref.             | —               |
| Lower                   | 831 (7.4)                     | 298 (35.9)                   | 1.15 (1.02–1.31) | 0.023           |
| Overweight              | 2825 (25.3)                   | 822 (29.1)                   | 1.05 (0.97–1.15) | 0.211           |
| Obesity                 | 696 (6.2)                     | 187 (26.9)                   | 0.98 (0.84–1.14) | 0.746           |
| Gender                  |                               |                              |                  |                 |
| Male                    | 7864 (70.3)                   | 2288 (29.1)                  | Ref.             | —               |
| Female                  | 3321 (29.7)                   | 987 (29.7)                   | 1.05 (0.95–1.15) | 0.333           |
| Age group               |                               |                              |                  |                 |
| 16–39                   | 2843 (25.4)                   | 480 (16.9)                   | Ref.             | —               |
| 40–49                   | 3452 (30.9)                   | 773 (22.4)                   | 1.23 (1.10–1.38) | <0.001          |
| 50–59                   | 2689 (24.0)                   | 965 (35.9)                   | 2.07 (1.85–2.32) | <0.001          |
| ≥60                     | 2201 (19.7)                   | 1057 (48.0)                  | 2.85 (2.53–3.22) | <0.001          |
| Marital status          |                               |                              |                  |                 |
| Married/Partnered       | 9836 (87.9)                   | 2848 (29.0)                  | Ref.             | —               |
| Other                   | 1349 (12.1)                   | 427 (31.7)                   | 0.86 (0.77–0.97) | 0.010           |
| Education               |                               |                              |                  |                 |
| Illiterate/semiliterate | 2732 (24.4)                   | 1028 (37.6)                  | Ref.             | —               |
| Primary school          | 2649 (23.7)                   | 840 (31.7)                   | 0.98 (0.89–1.08) | 0.735           |
| Middle school           | 3461 (30.9)                   | 894 (25.8)                   | 0.90 (0.82–0.99) | 0.038           |
| High school and above   | 2343 (20.9)                   | 513 (21.9)                   | 0.85 (0.76–0.97) | 0.012           |
| Insurance               |                               |                              |                  |                 |
| None                    | 1394 (12.5)                   | 378 (27.1)                   | Ref.             | —               |
| UEBMI                   | 1354 (12.1)                   | 323 (23.9)                   | 0.94 (0.80–1.10) | 0.416           |
| URBMI                   | 757 (6.8)                     | 202 (26.7)                   | 0.95 (0.80–1.13) | 0.562           |
| NRCMS                   | 6685 (59.8)                   | 2088 (31.2)                  | 1.00 (0.89–1.12) | 0.976           |
| Other                   | 995 (8.9)                     | 284 (28.5)                   | 1.01 (0.86–1.18) | 0.933           |
| Current smoking         |                               |                              |                  |                 |
| No                      | 6053 (54.1)                   | 1774 (29.3)                  | Ref.             | —               |
| Yes                     | 5132 (45.9)                   | 1501 (29.2)                  | 1.00 (0.92–1.09) | 0.996           |
| Drinking                |                               |                              |                  |                 |
| No                      | 8364 (74.8)                   | 2480 (29.7)                  | Ref.             | —               |
| Yes                     | 2821 (25.2)                   | 795 (28.2)                   | 0.93 (0.85–1.01) | 0.077           |
| Chronic diseases        |                               |                              |                  |                 |
| No                      | 9550 (85.4)                   | 2638 (27.6)                  | Ref.             | —               |
| Yes                     | 1635 (14.6)                   | 637 (39.0)                   | 1.22 (1.11–1.33) | <0.001          |
| Self-reported health    |                               |                              |                  |                 |
| Good                    | 5279 (47.2)                   | 1359 (25.7)                  | Ref.             | —               |
| Medium                  | 4237 (37.9)                   | 1212 (28.6)                  | 0.99 (0.92–1.08) | 0.865           |
| Poor                    | 1669 (14.9)                   | 704 (42.2)                   | 1.33 (1.20–1.48) | 0.000           |
| Outpatient services     |                               |                              |                  |                 |
| No                      | 9113 (81.5)                   | 2531 (27.8)                  | Ref.             | —               |
| Yes                     | 2072 (18.5)                   | 744 (35.9)                   | 1.06 (0.97–1.16) | 0.225           |
| Inpatient services      |                               |                              |                  |                 |
| No                      | 10512 (94.0)                  | 3043 (28.9)                  | Ref.             | —               |
| Yes                     | 673 (6.0)                     | 232 (34.5)                   | 1.00 (0.87–1.14) | 0.976           |

|                                 |             |             |                  |        |
|---------------------------------|-------------|-------------|------------------|--------|
| Residence                       |             |             |                  |        |
| Urban                           | 5084 (45.5) | 1319 (25.9) | Ref.             | —      |
| Rural                           | 6101 (54.5) | 1956 (32.1) | 1.12 (1.04–1.22) | 0.005  |
| Family economic level           |             |             |                  |        |
| Lowest                          | 2941 (26.3) | 1058 (36.0) | Ref.             | —      |
| Lower                           | 2567 (23.0) | 715 (27.9)  | 0.87 (0.79–0.96) | 0.007  |
| Higher                          | 3164 (28.3) | 876 (27.7)  | 0.85 (0.78–0.94) | 0.001  |
| Highest                         | 2513 (22.5) | 626 (24.9)  | 0.82 (0.73–0.92) | 0.001  |
| Family size                     |             |             |                  |        |
| 1–2                             | 2165 (19.4) | 885 (40.9)  | Ref.             | —      |
| 3–4                             | 5431 (48.6) | 1285 (23.7) | 0.73 (0.66–0.80) | <0.001 |
| ≥5                              | 3589 (32.1) | 1105 (30.8) | 0.78 (0.70–0.86) | <0.001 |
| Socioeconomic development level |             |             |                  |        |
| Lowest                          | 2358 (21.1) | 654 (27.7)  | Ref.             | —      |
| Lower                           | 3234 (28.9) | 981 (30.3)  | 1.04 (0.94–1.15) | 0.458  |
| Higher                          | 2015 (18.0) | 637 (31.6)  | 1.22 (1.09–1.36) | 0.001  |
| Highest                         | 3578 (32.0) | 1003 (28.0) | 1.09 (0.98–1.21) | 0.125  |

Notes: BMI: body mass index; UEBMI: urban employee basic medical insurance; URBMI: urban resident basic medical insurance; NRCMS: new rural cooperative medical scheme; CHE: Catastrophic health expenditure; aHR: adjusted hazard ratio; CI: confident interval; Ref.: Reference.

**Table S2.** Sensitivity analyses for association of BMI with risk of CHE in total participants and female participants.

| BMI groups  | Sensitivity analysis 1 |                 | Sensitivity analysis 2 |                 |
|-------------|------------------------|-----------------|------------------------|-----------------|
|             | aHR (95%CI)            | <i>p</i> -value | aHR (95%CI)            | <i>p</i> -value |
| Total       |                        |                 |                        |                 |
| Normal      | Ref.                   | —               | Ref.                   | —               |
| Underweight | 1.16 (1.02–1.31)       | 0.018           | 1.15 (1.01–1.30)       | 0.029           |
| Overweight  | 1.06 (0.97–1.15)       | 0.179           | 1.05 (0.97–1.15)       | 0.217           |
| Obesity     | 0.97 (0.84–1.13)       | 0.731           | 0.98 (0.84–1.14)       | 0.798           |
| Female      |                        |                 |                        |                 |
| Normal      | Ref.                   | —               | Ref.                   | —               |
| Underweight | 1.43 (1.17–1.75)       | 0.001           | 1.42 (1.16–1.74)       | 0.001           |
| Overweight  | 1.28 (1.1–1.48)        | 0.001           | 1.25 (1.08–1.46)       | 0.003           |
| Obesity     | 1.24 (0.97–1.6)        | 0.090           | 1.23 (0.96–1.58)       | 0.102           |

Notes: BMI: body mass index; aHR: adjusted hazard ratio; CI: confident interval.
